# Supplementary material for: Reduced Anti-Histone Antibodies and Increased Risk of Rheumatoid Arthritis Associated with a Single Nucleotide Polymorphism in PADI4 in North Americans
Source: PubMed Central journal article supplement (PMC6627847; doi:10.3390/ijms20123093), 2019-06-25
Supplement: ijms-20-03093-s001.pdf [file ijms-20-03093-s001.pdf]

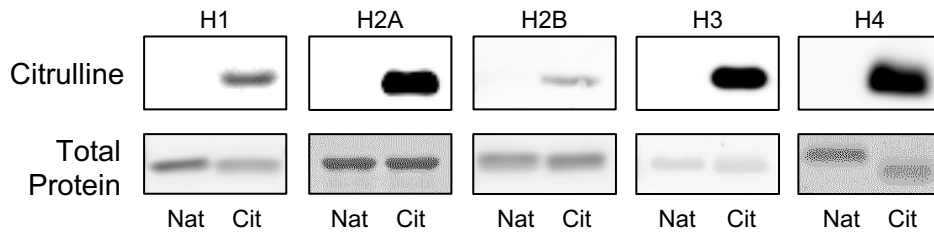

**Supplementary Figure 1. Citrullination of Histones.** Recombinant human histones H1, H2A, H2B, H3, and H4 were incubated in buffer alone (Nat) or citrullinated with PAD4 in buffer (Cit). 2 $\mu$ g of each histone was run by SDS-PAGE for total protein visualization by Coomassie staining and blotting for visualization of citrullination using the anti-citrulline (modified) detection kit (MilliporeSigma) according to manufacturer's instructions. Blots are representative of at least 5 replicates.

**Table S1. Characteristics of Rheumatoid Arthritis (RA) and Control Subjects**

|                                          | Control    |            |      | CCP-       |            |      | CCP+           |                 |             |
|------------------------------------------|------------|------------|------|------------|------------|------|----------------|-----------------|-------------|
|                                          | GG (n=23)  | TT (n=16)  | p    | GG (n=27)  | TT (n=14)  | p    | GG (n=46)      | TT (n=24)       | p           |
| Age, mean years (SE)                     | 49.5 (3.8) | 53.1 (4.6) | 0.55 | 59.3 (2.4) | 56.3 (3.6) | 0.47 | 61.2 (1.8)     | 58.2 (2.3)      | 0.31        |
| Sex, female (%)                          | 19 (82.6)  | 14 (87.5)  | 0.68 | 20 (74.1)  | 11 (78.6)  | 0.75 | 34 (73.9)      | 18 (75.0)       | 0.92        |
| Body Mass Index, mean (SE)               | 31.5 (1.7) | 26.1 (2.4) | 0.07 | 28.7 (1.3) | 28.6 (2.4) | 0.97 | 30.0 (0.8)     | 30.6 (1.6)      | 0.70        |
| Smoking Status, number (%)               |            |            |      |            |            |      |                |                 |             |
| Current smoker                           | 1 (4.4)    | 2 (12.5)   | 0.20 | 3 (11.1)   | 0 (0.0)    | 0.41 | <b>3 (6.5)</b> | <b>5 (20.8)</b> | <b>0.03</b> |
| Former smoker                            | 3 (13.0)   | 5 (31.3)   |      | 9 (33.3)   | 6 (42.9)   |      | 21 (45.7)      | 4 (16.7)        |             |
| Never smoked                             | 19 (82.6)  | 9 (56.3)   |      | 15 (55.6)  | 8 (57.1)   |      | 22 (47.8)      | 15 (62.6)       |             |
| Charlson Comorbidity Score, mean (SE)    | 1.6 (0.4)  | 1.4 (0.4)  | 0.67 | 4.0 (0.6)  | 3.7 (0.6)  | 0.79 | 3.6 (0.3)      | 3.3 (0.4)       | 0.48        |
| Race/Ethnicity, number (%)               |            |            |      |            |            |      |                |                 |             |
| White                                    | 21 (91.3)  | 13 (81.3)  | 0.61 | 22 (81.5)  | 12 (85.7)  | 0.85 | 40 (87.0)      | 17 (70.8)       | 0.30        |
| Black                                    | 0 (0.0)    | 0 (0.0)    |      | 1 (3.7)    | 1 (7.1)    |      | 1 (2.2)        | 3 (12.5)        |             |
| Hispanic                                 | 0 (0.0)    | 0 (0.0)    |      | 1 (3.7)    | 0 (0.0)    |      | 2 (4.4)        | 2 (8.3)         |             |
| Native American                          | 1 (4.4)    | 1 (6.3)    |      | 1 (3.7)    | 1 (7.1)    |      | 2 (4.4)        | 2 (8.3)         |             |
| Asian                                    | 1 (4.4)    | 2 (12.5)   |      | 1 (3.7)    | 0 (0.0)    |      | 0 (0.0)        | 0 (0.0)         |             |
| Pacific Islander                         | 0 (0.0)    | 0 (0.0)    |      | 0 (0.0)    | 0 (0.0)    |      | 0 (0.0)        | 0 (0.0)         |             |
| Other                                    | 0 (0.0)    | 0 (0.0)    |      | 1 (3.7)    | 0 (0.0)    |      | 1 (2.2)        | 0 (0.0)         |             |
| Rheumatoid Factor Positive, number (%)   | -          | -          | -    | 5 (71.4)   | 2 (28.6)   | 0.59 | 33 (67.4)      | 16 (32.7)       | 0.70        |
| Erosive Disease, number (%)              | -          | -          | -    | 12 (54.6)  | 10 (45.5)  | 0.10 | 22 (75.9)      | 7 (24.1)        | 0.13        |
| Time Since RA Diagnosis, mean years (SE) | -          | -          | -    | 20.0 (3.3) | 13.1 (2.7) | 0.18 | 14.9 (1.8)     | 11.8 (2.0)      | 0.28        |

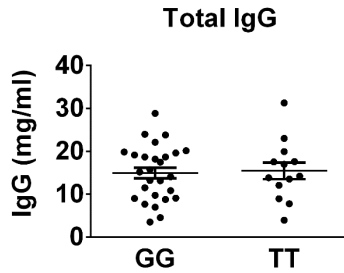

**Supplementary Figure 2. Total Serum IgG levels in CCP- Rheumatoid Arthritis Subjects.** Total IgG was quantified in CCP- rheumatoid arthritis subjects using the Human IgG Total ELISA Ready-SET-Go! Kit (Thermo Fisher Scientific) according to the manufacturer's instructions. Serum IgG levels were compared between homozygotes for the G and T alleles of rs2240335 by t test with the mean  $\pm$  SEM graphed. No significant difference was seen. n=27 GG and n=13 TT.
